# Supplementary material for: A Clostridium difficile-Specific, Gel-Forming Protein Required for Optimal Spore Germination
Source: PubMed Central journal article supplement (PMC5241399; doi:10.1128/mbio.02085-16), 2017-01-17
Supplement: mbo002173148sf1.pdf [file mbo002173148sf1.pdf]

**A.**

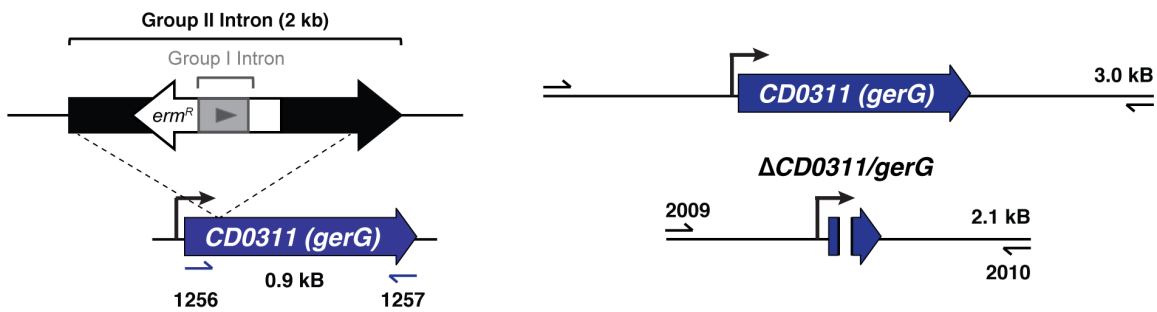

**B.**

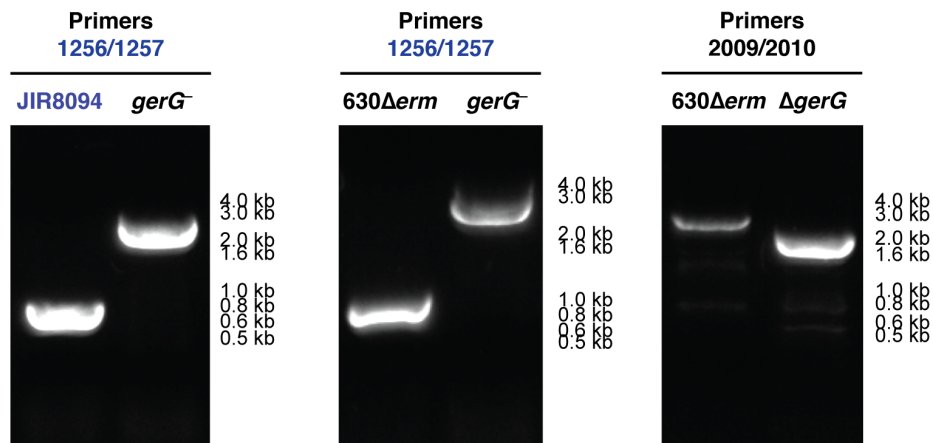

**C.**

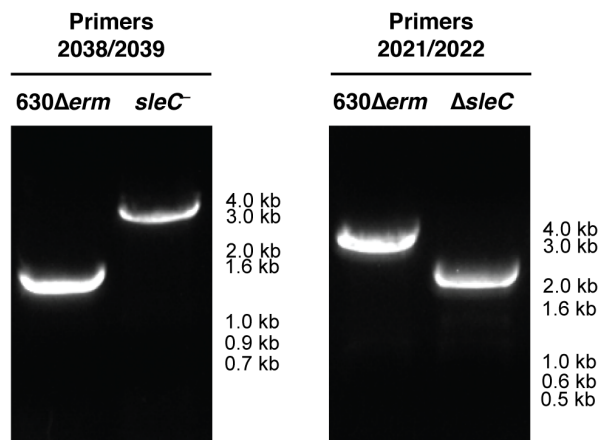

**FIG S1. Construction of *gerG* (*CD0311*) and *sleC* mutants.** (A) Schematic of the Targetron-based disruption of *gerG* in *JIR8094* and *630ΔermΔpyrE* (*gerG::ermB*) and deletion of *gerG*

(*ΔgerG*) in 630 $\Delta$ *erm* $\Delta$ *pyrE*. (B) Colony PCR of *sleC::ermB* and  $\Delta$ *sleC* constructed in 630 $\Delta$ *erm* $\Delta$ *pyrE*. The group II intron is ~2 kB.
