# Supplementary material for: A Clostridium difficile-Specific, Gel-Forming Protein Required for Optimal Spore Germination
Source: PubMed Central journal article supplement (PMC5241399; doi:10.1128/mbio.02085-16), 2017-01-17
Supplement: mbo002173148sf2.pdf [file mbo002173148sf2.pdf]

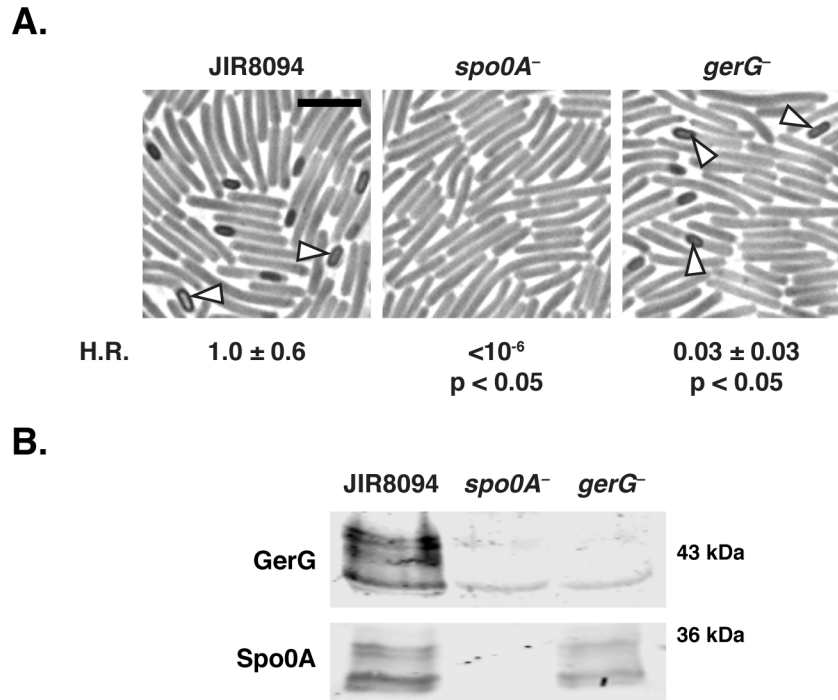

**FIG S2. A targetron insertion in *CD0311* in the JIR8094 strain background leads to a heat resistance defect.** (A) Phase contrast microscopy of sporulating cells of wild type JIR8094, *spo0A::ermB* (*spo0A*<sup>-</sup>), and *gerG::ermB* (*gerG*<sup>-</sup>). *spo0A*<sup>-</sup> cannot initiate sporulation (14). Phase-bright spores are visible in both wild type and *gerG*<sup>-</sup> (white triangles). H.R. represents the average heat-resistance of each strain relative to wild type as determined from three biological replicates. The standard deviation is shown. Statistical significance relative to wild type was determined using one-way ANOVA and Tukey's test. Scale bars represent 5  $\mu$ m. (B) Western blot analysis of GerG and the Spo0A loading control (11) in sporulating cells of the indicated strains.
