# Supplementary material for: A Clostridium difficile-Specific, Gel-Forming Protein Required for Optimal Spore Germination
Source: PubMed Central journal article supplement (PMC5241399; doi:10.1128/mbio.02085-16), 2017-01-17
Supplement: mbo002173148sf8.pdf [file mbo002173148sf8.pdf]

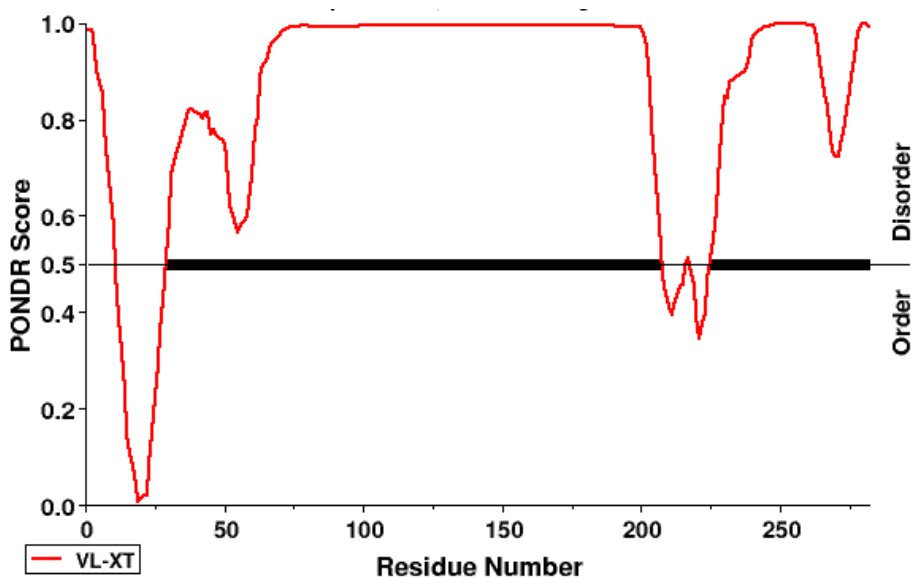

|      |            |            |            |             |            |
|------|------------|------------|------------|-------------|------------|
| 1    | MSNKKKKDLD | TSYMPYLDPA | NYADYITNEE | IPQDELNRNDP | QISNGYTKIP |
| VLXT | DDDDDDDDDD |            | DD         | DDDDDDDDDD  | DDDDDDDDDD |
| 51   | NNQNINNLYP | NNVNHYPKSS | NSPNNLPNTN | NTSGNMNYNT  | SATNNMPNNM |
| VLXT | DDDDDDDDDD | DDDDDDDDDD | DDDDDDDDDD | DDDDDDDDDD  | DDDDDDDDDD |
| 101  | NNNTGMPNNM | SNNMNSNMGM | PNNMSNNMNS | NMGMPNNMPN  | NMNSNMGMPN |
| VLXT | DDDDDDDDDD | DDDDDDDDDD | DDDDDDDDDD | DDDDDDDDDD  | DDDDDDDDDD |
| 151  | NVPNNMNSNM | GMPNNMSNNM | NSNMGMPNNM | SGNMNNNMYG  | NTGMPNNMNS |
| VLXT | DDDDDDDDDD | DDDDDDDDDD | DDDDDDDDDD | DDDDDDDDDD  | DDDDDDDDDD |
| 201  | NMGYNMNNM  | GIPNFSCNQ  | MPPNVLMIP  | GVICHNTMQG  | MPVVPSTMP  |
| VLXT | DDDDDD     | D          | DDDDDD     | DDDDDDDDDD  | DDDDDDDDDD |
| 251  | PNIYPTPYGS | SNMSIQGIPQ | ATNIEEFDEE | EM          |            |
| VLXT | DDDDDDDDDD | DDDDDDDDDD | DDDDDDDDDD | DD          |            |

**FIG S8. PONDR plot analysis of GerG.** The heavy horizontal black bars indicate regions of predicted disorder as determined by PONDR using the VL-XT algorithm. The exact residues predicted to be disordered are indicated by a blue “D.”
