# Supplementary material for: A Clostridium difficile-Specific, Gel-Forming Protein Required for Optimal Spore Germination
Source: PubMed Central journal article supplement (PMC5241399; doi:10.1128/mbio.02085-16), 2017-01-17
Supplement: mbo002173148sf9.pdf [file mbo002173148sf9.pdf]

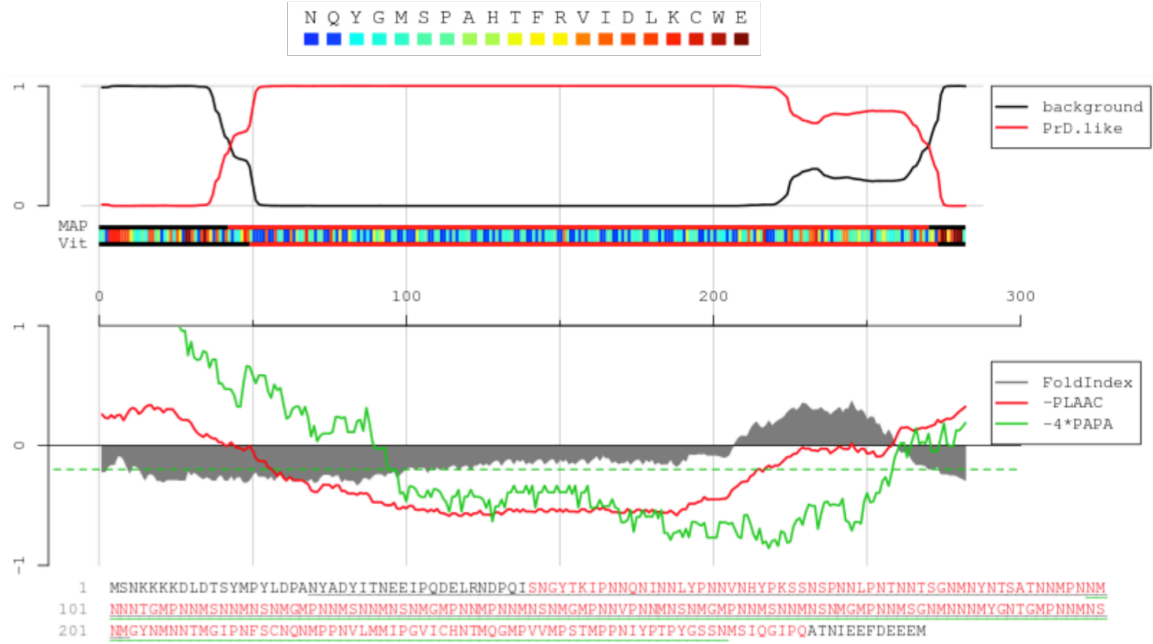

**FIG S9. PLAAC analysis of GerG.** Predicted prion-like domains (PrDs) in GerG are highlighted in red. Each amino acid is color coded by its enrichment log-likelihood ratio in PrDs. 4\*PAPA represents PrD prediction using the PAPA algorithm, while FoldIndex predicts intrinsically unfolded protein regions (16).
